# Supplementary material for: Instrument uncertainties of network-suitable ground-based microwave radiometers: overview, quantification, and mitigation strategies
Source: Copernicus journal article supplement (doi:10.5194/egusphere-2025-1727), 2025-04-25
Supplement: Supplementary file [file egusphere-2025-1727-RC1-supplement.pdf]

**Title:** *Instrument uncertainties of network-suitable ground-based microwave radiometers: overview, quantification, and mitigation strategies*

**Authors:** Tobias Böck et al.

**Journal:** *Atmospheric Measurement Techniques Discussions / EGU sphere*

**DOI:** <https://doi.org/10.5194/egusphere-2025-1727>

### **General comments:**

This manuscript presents a technically rigorous and operationally relevant assessment of instrumental uncertainties associated with state-of-the-art HATPRO-Gen5 microwave radiometers. The study is well-conceived, timely, and aligns with current efforts across initiatives such as ACTRIS, GRUAN, and E-PROFILE to establish standardized, high-quality microwave radiometer (MWR) networks for both research and numerical weather prediction applications.

The work is particularly valuable for its:

- Systematic breakdown of key uncertainty sources (radiometric noise, calibration repeatability, drift/jumps, inter-instrument biases, and radome degradation),
- Use of long-term datasets and controlled calibration campaigns,
- Practical framework for operational traceability (e.g., "time to dry" metric, OmB-based quality control).

### **Technical suggestions:**

- **Figure 3, Page 11**
  - The current color choices for representing radiometric noise (red, orange, and purple) are difficult to differentiate. Consider using a more contrasting palette to enhance clarity
- **Page 14, Line 398**
  - The phrase *"this makes it hard to quantify these jumps meaningfully"* could be more formally written as, for example, *"This limits the ability to reliably quantify calibration-induced drifts."*
- **Page 17, Section 4.3**
  - It would be helpful to specify that the repeatability tests were carried out during clear-sky and fair-weather conditions, along with relevant environmental parameters such as temperature and humidity, to support interpretation of the results.
- **Page 18, Line 536**
  - The phrase *"biases are not readily detectable by operators"* could be expanded with a short note that *"side-by-side intercomparison are rarely feasible in operational networks"* for clarity.
- **Page 23, Figure 12 Caption**
  - Specify whether the "time to dry" metric is site-specific or generalizable. Indicate environmental dependencies (e.g., UV exposure, rain intensity).
- **Page 24, Line 650**
  - Consider rephrasing: *"a radome replacement is necessary if the time to dry is longer than 10 min"* → *"We recommend replacing the radome once the drying time consistently exceeds 10 minutes under standard operating conditions."*
- **Page 24, Section 5**

- The textual list of actions is valuable but could be presented more clearly by providing a summary table. Possible columns for the table: Action, Uncertainty addressed, Recommended frequency, Operational burden (e.g., Low, Medium, High), Priority (Essential / Recommended / Optional).

### **Conclusion**

The paper is clearly written, well organized, and meets the high standards expected by Atmospheric Measurement Techniques. With minor revisions as outlined below, the manuscript is fully suitable for publication.
